# Supplementary material for: Presynaptic Rac1 controls synaptic strength through the regulation of synaptic vesicle priming
Source: eLife journal article supplement (doi:10.7554/elife.81505), 2022-10-10
Supplement: supp [file elife-81505-supp-v1.zip]

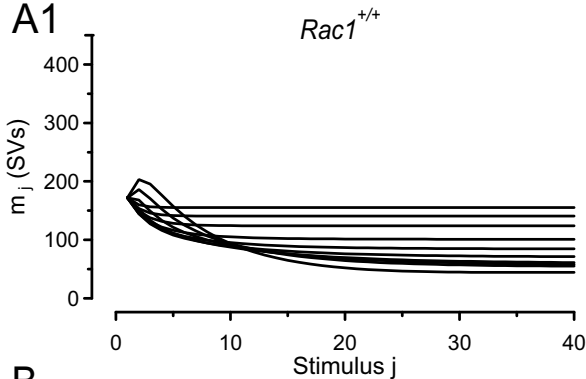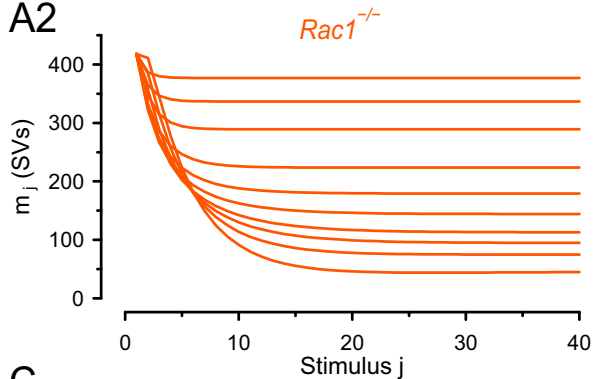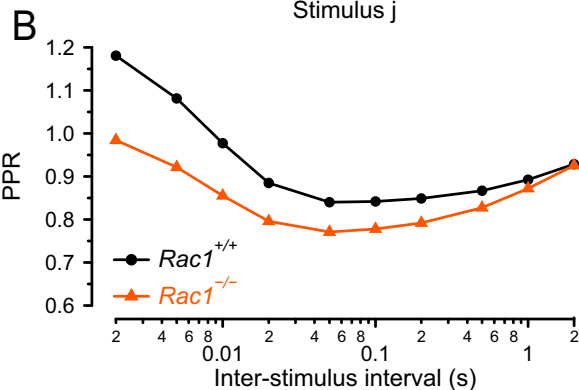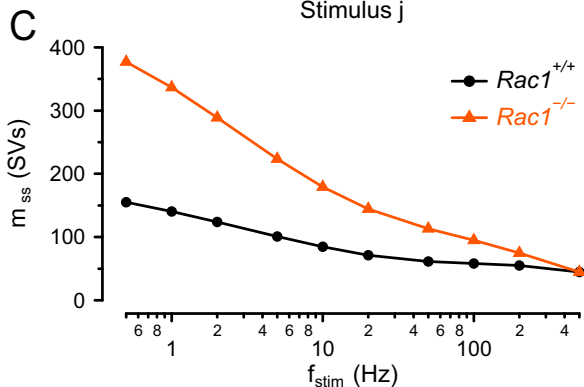

**D1**

| Parameter                        | Value   | Unit                            |
|----------------------------------|---------|---------------------------------|
| [Ca <sup>2+</sup> ] decay $\tau$ | 0.028   | s                               |
| [Ca <sup>2+</sup> ] amplitude    | 1.0E-07 | M                               |
| $P_r$                            | 0.08    |                                 |
| $N_{total}$                      | 2650    |                                 |
| $k_f$                            | 0.5     | s <sup>-1</sup>                 |
| $k_b$                            | 0.116   | s <sup>-1</sup>                 |
| $\sigma$                         | 9.6E+06 | s <sup>-1</sup> M <sup>-1</sup> |
| $K_{0.5}$                        | 3.1E-06 | M                               |
| $y_{inc}$                        | 0.5     |                                 |
| $z_{dec}$                        | 0.4     |                                 |
| $y_{max}$                        | 1.2     |                                 |
| $z_{min}$                        | 0.75    |                                 |
| $\tau_y$                         | 0.01    | s                               |
| $\tau_z$                         | 3       | s                               |

**D2**

| Parameter                        | Value   | Unit                            |
|----------------------------------|---------|---------------------------------|
| [Ca <sup>2+</sup> ] decay $\tau$ | 0.028   | s                               |
| [Ca <sup>2+</sup> ] amplitude    | 1.0E-07 | M                               |
| $P_r$                            | 0.165   |                                 |
| $N_{total}$                      | 2900    |                                 |
| $k_f$                            | 0.8     | s <sup>-1</sup>                 |
| $k_b$                            | 0.116   | s <sup>-1</sup>                 |
| $\sigma$                         | 1.8E+07 | s <sup>-1</sup> M <sup>-1</sup> |
| $K_{0.5}$                        | 6.6E-07 | M                               |
| $y_{inc}$                        | 0.5     |                                 |
| $z_{dec}$                        | 0.4     |                                 |
| $y_{max}$                        | 1.15    |                                 |
| $z_{min}$                        | 0.75    |                                 |
| $\tau_y$                         | 0.01    | s                               |
| $\tau_z$                         | 3       | s                               |
