# Supplementary material for: Presynaptic Rac1 controls synaptic strength through the regulation of synaptic vesicle priming
Source: eLife journal article supplement (doi:10.7554/elife.81505), 2022-10-10
Supplement: supp [file elife-81505-supp-v1.zip]

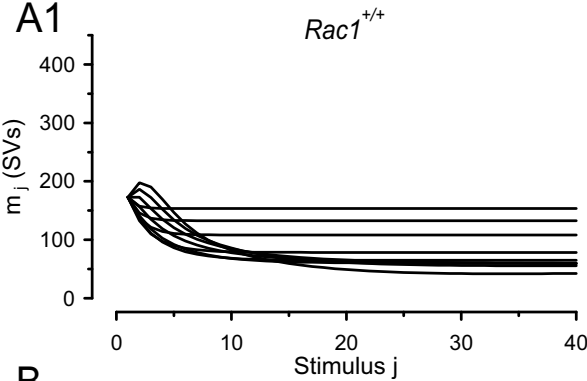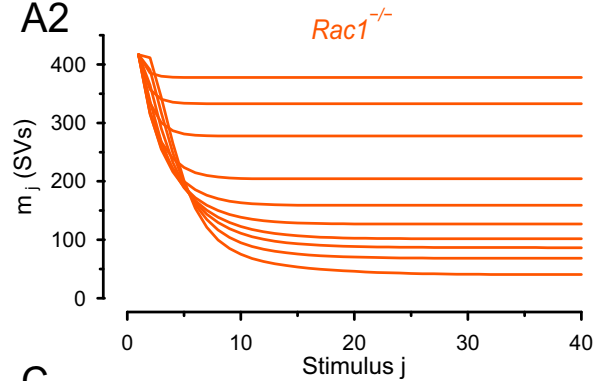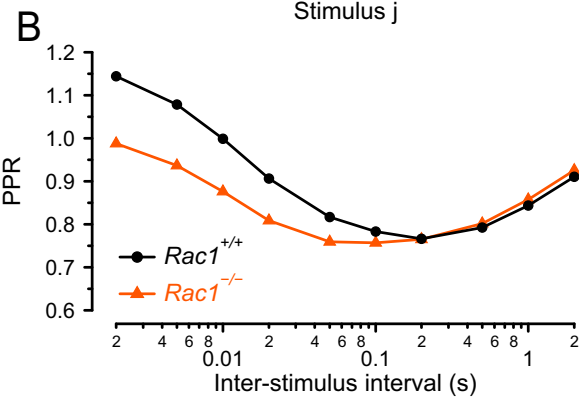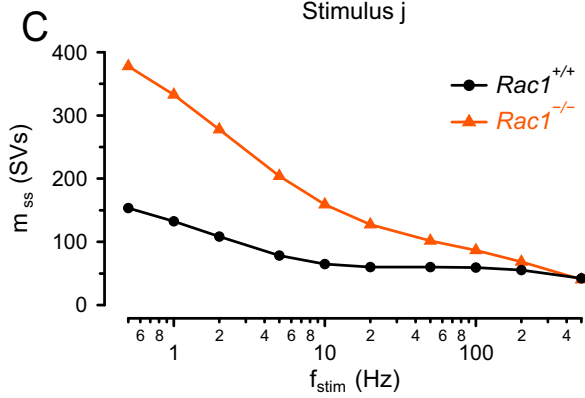

**D1**

| Parameter                        | Value   | Unit                            |
|----------------------------------|---------|---------------------------------|
| [Ca <sup>2+</sup> ] decay $\tau$ | 0.043   | s                               |
| [Ca <sup>2+</sup> ] amplitude    | 9.5E-08 | M                               |
| $P_r$                            | 0.25    |                                 |
| $N_{total}$                      | 3000    |                                 |
| $k_1$                            | 0.84    | s <sup>-1</sup>                 |
| $b_1$                            | 0.42    | s <sup>-1</sup>                 |
| $\sigma_1$                       | 5.7E+06 | s <sup>-1</sup> M <sup>-1</sup> |
| $k_2$                            | 0.31    | s <sup>-1</sup>                 |
| $b_2$                            | 0.69    | s <sup>-1</sup>                 |
| $\sigma_2$                       | 4.6E+06 | s <sup>-1</sup> M <sup>-1</sup> |
| TSL decay $\tau$                 | 0.08    |                                 |
| TSL fraction                     | 0.08    |                                 |
| $K_{0.5}$                        | 5.6E-06 | M                               |
| $y_{inc}$                        | 0.34    |                                 |
| $z_{dec}$                        | 0.4     |                                 |
| $y_{max}$                        | 1.23    |                                 |
| $z_{min}$                        | 0.8     |                                 |
| $\tau_y$                         | 0.014   |                                 |
| $\tau_z$                         | 3       |                                 |

**D2**

| Parameter                        | Value   | Unit                            |
|----------------------------------|---------|---------------------------------|
| [Ca <sup>2+</sup> ] decay $\tau$ | 0.043   | s                               |
| [Ca <sup>2+</sup> ] amplitude    | 9.5E-08 | M                               |
| $P_r$                            | 0.25    |                                 |
| $N_{total}$                      | 3000    |                                 |
| $k_1$                            | 1.05    | s <sup>-1</sup>                 |
| $b_1$                            | 0.35    | s <sup>-1</sup>                 |
| $\sigma_1$                       | 1.2E+07 | s <sup>-1</sup> M <sup>-1</sup> |
| $k_2$                            | 1.3     | s <sup>-1</sup>                 |
| $b_2$                            | 0.78    | s <sup>-1</sup>                 |
| $\sigma_2$                       | 2.2E+07 | s <sup>-1</sup> M <sup>-1</sup> |
| TSL decay $\tau$                 | 0.08    |                                 |
| TSL fraction                     | 0.08    |                                 |
| $K_{0.5}$                        | 8.5E-07 | M                               |
| $y_{inc}$                        | 0.34    |                                 |
| $z_{dec}$                        | 0.4     |                                 |
| $y_{max}$                        | 1.23    |                                 |
| $z_{min}$                        | 0.8     |                                 |
| $\tau_y$                         | 0.014   |                                 |
| $\tau_z$                         | 3       |                                 |
